# Supplementary material for: An integrated chromatin accessibility and transcriptome landscape of human pre-implantation embryos
Source: PubMed Central journal article supplement (PMC6341076; doi:10.1038/s41467-018-08244-0), 2019-01-21
Supplement: 41467_2018_8244_MOESM2_ESM.pdf [file 41467_2018_8244_MOESM2_ESM.pdf]

## **Description of Additional Supplementary Files**

File Name: Supplementary Data 1

Description: Summary statistics of all sequencing datasets used in this study.

File Name: Supplementary Data 2

Description: Normalized chromatin accessibility and gene expression level of EGA genes at each stage.

File Name: Supplementary Data 3

Description: Enrichment of TF motifs at each stage.

File Name: Supplementary Data 4

Description: Normalized chromatin accessibility and RNA expression level of retrotransposons at each stage.
